# Supplementary material for: Subpopulations of Staphylococcus aureus Clonal Complex 121 Are Associated with Distinct Clinical Entities
Source: PubMed Central journal article supplement (PMC3591430; doi:10.1371/journal.pone.0058155), 2013-03-07
Supplement: pone.0058155.s002.pdf [file pone.0058155.s002.pdf]

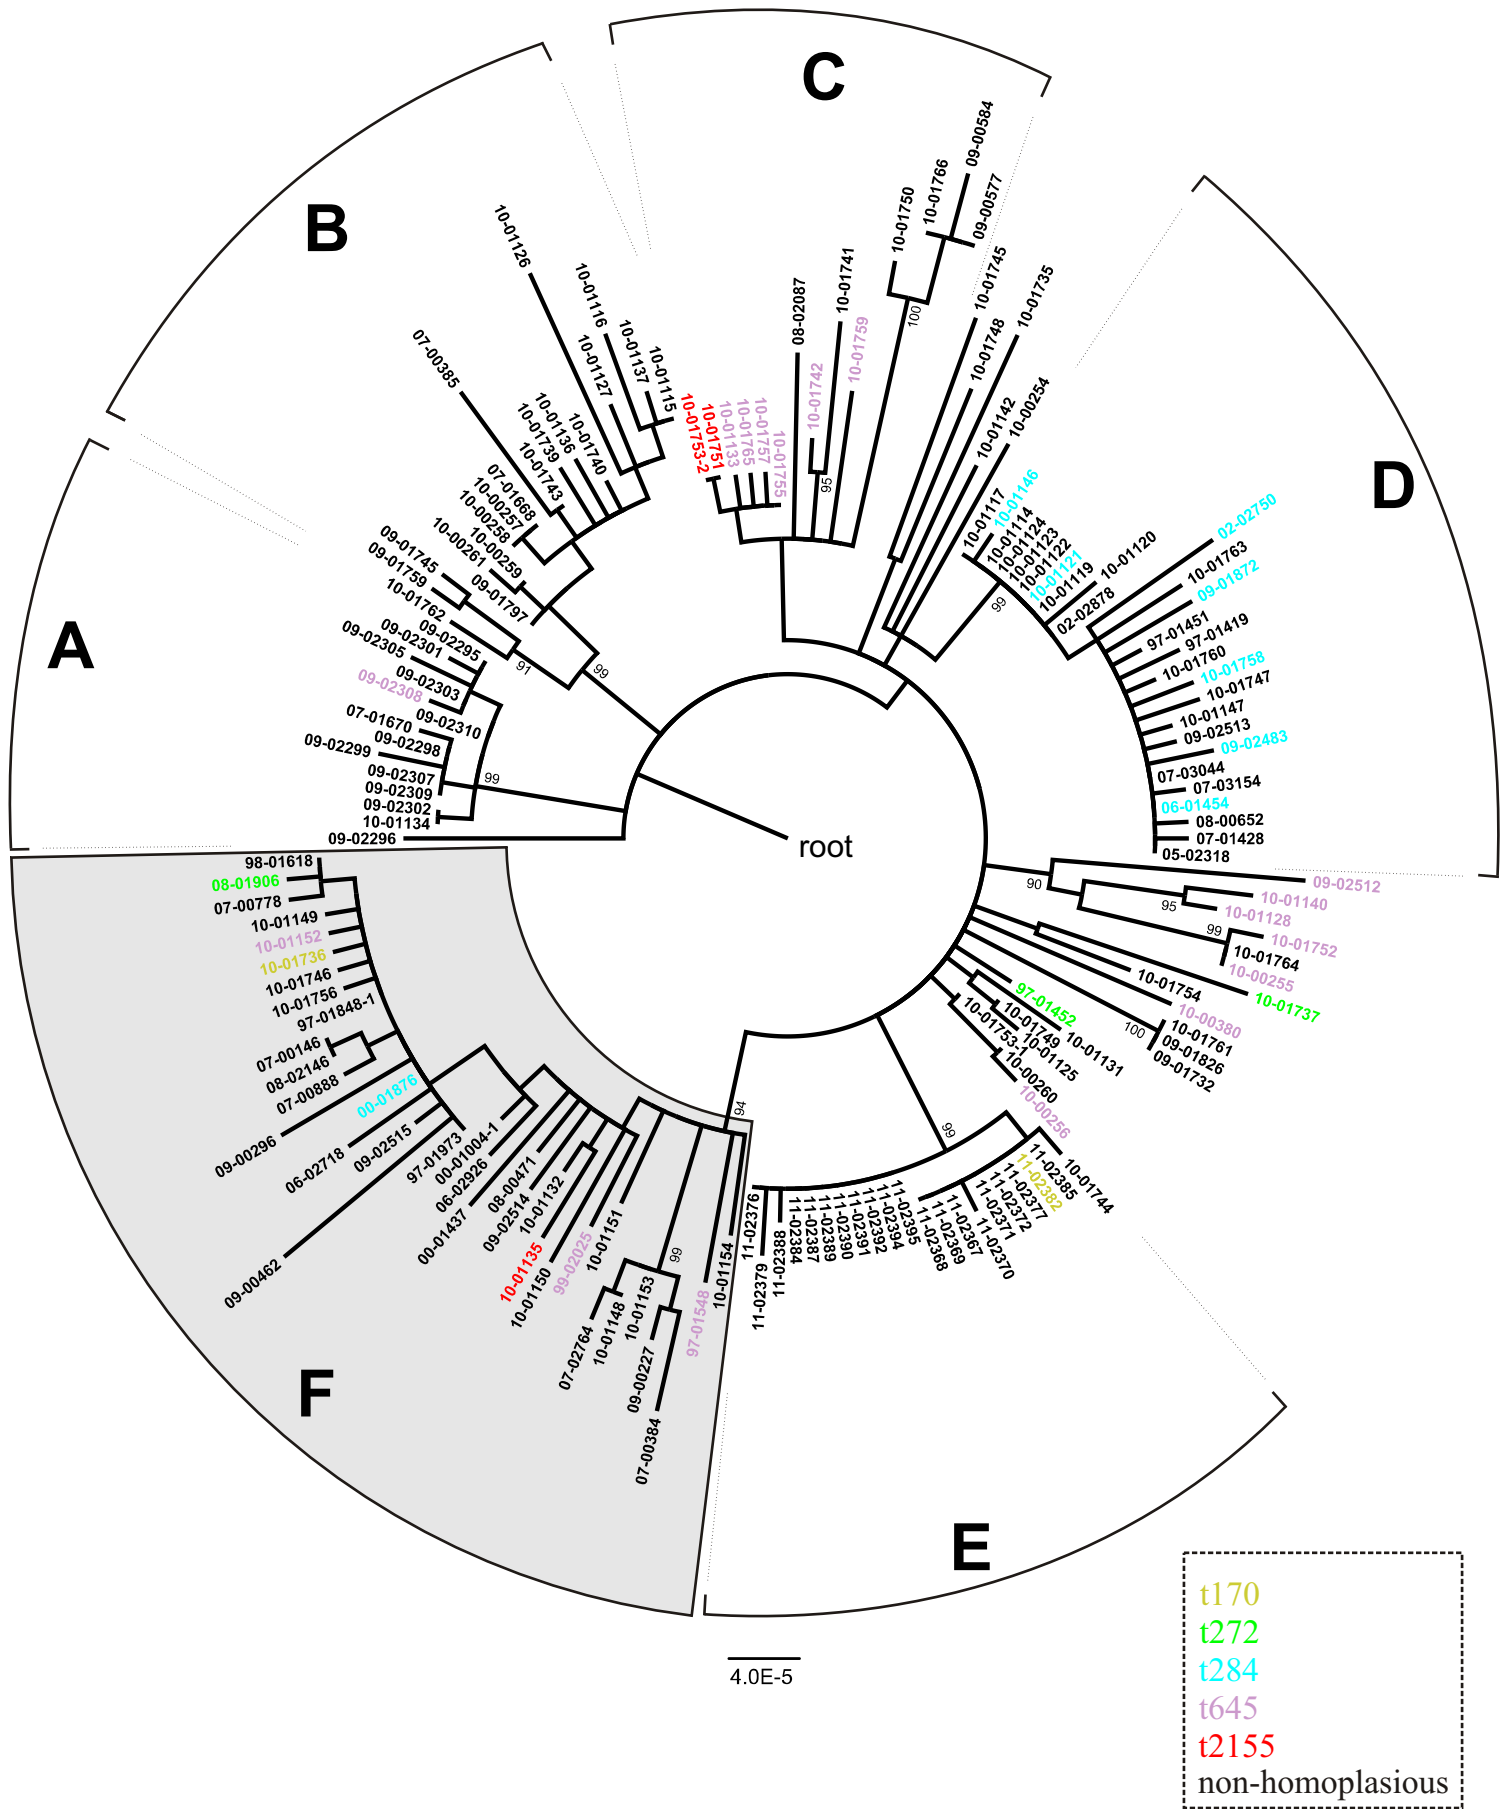

Figure S2
